# Supplementary material for: Variable Patterns of Remission From ADHD in the Multimodal Treatment Study of ADHD
Source: Atypon-hosted journal article supplement (doi:10.1176/appi.ajp.2021.21010032), 2021-08-13
Supplement: appi.ajp.2021.21010032.ds001.pdf [file appi.ajp.2021.21010032.ds001.pdf]

Data supplement for Sibley et al., Variable Patterns of Remission From ADHD in the Multimodal Treatment Study of ADHD. *Am J Psychiatry* (doi: 10.1176/appi.ajp.2021.21010032)

## **MTA Collaborators**

The Multimodal Treatment Study of Children with ADHD (MTA) was a National Institute of Mental Health (NIMH) cooperative agreement randomized clinical trial, continued under an NIMH contract as a follow-up study and finally under a National Institute on Drug Abuse (NIDA) contract. Collaborators from NIMH: Benedetto Vitiello, M.D. (formerly with the Child & Adolescent Treatment and Preventive Interventions Research Branch), Joanne B. Severe, M.S. (formerly with the Clinical Trials Operations and Biostatistics Unit, Division of Services and Intervention Research), Peter S. Jensen, M.D. (formerly with the Office of the Director, NIMH, currently at REACH Institute and the University of Arkansas for Medical Sciences), L. Eugene Arnold, M.D., M.Ed. (currently at Ohio State University), Kimberly Hoagwood, Ph.D. (currently at NYU); previous contributors from NIMH to the early phases: John Richters, Ph.D. (currently at National Institute of Nursing Research); Donald Vereen, M.D. (currently at NIDA). Principal investigators and co-investigators from the sites are: University of California, Berkeley/San Francisco: Stephen P. Hinshaw, Ph.D. (Berkeley), Glen R. Elliott, Ph.D., M.D. (San Francisco); Duke University: Karen C. Wells, Ph.D., Jeffery N. Epstein, Ph.D. (currently at Cincinnati Children's Hospital Medical Center), Desiree W. Murray, Ph.D.; previous Duke contributors to early phases: C. Keith Conners, Ph.D. (former PI); John March, M.D., M.P.H.; University of California, Irvine: James Swanson, Ph.D., Timothy Wigal, Ph.D.; previous contributor from UCLA to the early phases: Dennis P. Cantwell, M.D. (deceased); New York University: Howard B. Abikoff, Ph.D.; Montreal Children's Hospital/McGill University: Lily Hechtman, M.D.; New York State Psychiatric Institute/Columbia University/Mount Sinai Medical Center: Laurence L. Greenhill, M.D. (Columbia), Jeffrey H. Newcorn, M.D. (Mount Sinai School of Medicine). University of Pittsburgh: Brooke Molina, Ph.D., Betsy Hoza, Ph.D. (currently at University of Vermont), William E. Pelham, Ph.D. (PI for early phases, currently at Florida International University). Follow-up phase statistical collaborators: Robert D. Gibbons, Ph.D. (University of Illinois, Chicago); Sue Marcus, Ph.D. (Mt. Sinai College of Medicine); Kwan Hur, Ph.D. (University of Illinois, Chicago). Original study statistical and design consultant: Helena C. Kraemer, Ph.D. (Stanford University). Collaborator from the Office of Special Education Programs/US Department of Education: Thomas Hanley, Ed.D. Collaborator from Office of Juvenile Justice and Delinquency Prevention/Department of Justice: Karen Stern, Ph.D.

## **S1. Baseline Characteristics of the MTA Sample (see MTA Cooperative Group, 1999)**

| <b>Variable</b>               | <b>Total Across All Treatment Groups</b> |
|-------------------------------|------------------------------------------|
| Age <i>M (SD)</i>             | 8.5 (0.8)                                |
| Male n (%)                    | 465 (80.3)                               |
| Ethnicity n (%)               |                                          |
| White                         | 351 (60.6)                               |
| African-American              | 115 (19.9)                               |
| Hispanic                      | 48 (8.3)                                 |
| Full Scale IQ <i>M (SD)</i>   | 100.9 (14.8)                             |
| Comorbidity (DISC) n (%)      |                                          |
| Anxiety Disorder              | 194 (33.5)                               |
| Conduct Disorder              | 83 (14.3)                                |
| Oppositional-Defiant Disorder | 231 (39.9)                               |
| Affective Disorder            | 22 (3.8)                                 |

## **S2. Supplemental Columbia Impairment Scale (CIS) and Impairment Rating Scale (IRS) Analyses to determine optimal threshold for “no impairment.”**

- Sample: MTA Local Normative Comparison Group without baseline ADHD diagnoses (N=258).
- Goal:
  - Select “no impairment” thresholds that are consistent with an approximate percentile of 82 or lower, consistent with interpretation of standardized impairment measures (Goldstein & Naglieri, 2016).
- Method: Parent report on the CIS was collected when participants were under the age of 18. Parent and self report on the IRS were collected when participants were 18 and older. Parent and self reports on the IRS were combined using an item-level OR-rule. Percentiles for measures in the LNCG were calculated by year using the following formula:  $[(m + 0.5 k)/N]*100$ , where  $m$  = number of LNCG obtaining a score at or below the threshold,  $k$  = number of LNCG obtaining a score above the threshold, and  $N$  = total sample size (Crawford et al., 2009).
- Results:

## IRS

### IRS Item Responses:

0=No Problem, Definitely do not need treatment or special services

1

2

3

4

5

6=Extreme Problem, Definitely need treatment or special services

|                            | 10 year | 12 year | 14 year | 16 year | Average |
|----------------------------|---------|---------|---------|---------|---------|
| 3 or lower on overall item | 95.6%   | 96.4%   | 95.0%   | 96.4%   | 95.85%  |
| 2 or lower on overall item | 92.9%   | 94.4%   | 92.6%   | 94.3%   | 93.55%  |
| 1 or lower on overall item | 88.8%   | 91.7%   | 87.2%   | 91.4%   | 89.78%  |
| 3 or lower on all items    | 88.1%   | 89.7%   | 87.2%   | 90.0%   | 88.75%  |
| 2 or lower on all items    | 81.3%   | 84.1%   | 80.7%   | 82.4%   | 82.13%  |
| 1 or lower on all items    | 72.4%   | 74.2%   | 72.7%   | 74.1%   | 73.35%  |

*Note.* The IRS possessed an overall impairment item that we considered in addition to using an “OR rule” across items. In the end, the OR rule was more sensitive to variations in functioning in the normative sample, providing a psychometrically sounder index of impairment.

CIS (administered to participants under 18 at 2-, 3-, 6-, and 8-year assessments)

### CIS Item Responses:

0=No Problem

1

2=Some Problem

3

4=A Very Bad Problem

|                        | 2 year | 3 year | 6 year | 8 year | Average |
|------------------------|--------|--------|--------|--------|---------|
| 3 or lower on any item | 98.3%  | 96.9%  | 94.1%  | 96.4%  | 96.43%  |
| 2 or lower on any item | 93.0%  | 92.2%  | 87.0%  | 89.6%  | 90.45%  |
| 1 or lower on any item | 69.6%  | 75.8%  | 67.5%  | 72.3%  | 71.30%  |
| 0 on all items         | 55.8%  | 58.0%  | 54.1%  | 56.6%  | 56.13%  |

*Note.* Unlike the IRS, the CIS does not possess an overall impairment item. We also considered a limited set of items that removed CIS items that seemed specifically related to internalizing disorders (i.e., having fun, happiness) and less central to ADHD; however, doing so made almost no difference in the percentage of youth at each threshold (see below). Furthermore, the case was made in the MTA Cooperative group phone call (meeting minutes, 08.25.20) that ADHD may also lead to impairments in traditional internalizing domains for some youth.

**highestitem \* highestitemNOINT Crosstabulation**

| Count       |      | highestitemNOINT |      |      |      |      | Total |
|-------------|------|------------------|------|------|------|------|-------|
|             |      | .00              | 1.00 | 2.00 | 3.00 | 4.00 |       |
| highestitem | .00  | 30               | 0    | 0    | 0    | 0    | 30    |
|             | 1.00 | 1                | 70   | 0    | 0    | 0    | 71    |
|             | 2.00 | 0                | 0    | 121  | 0    | 0    | 121   |
|             | 3.00 | 0                | 0    | 0    | 27   | 0    | 27    |
|             | 4.00 | 0                | 0    | 0    | 0    | 9    | 9     |
| Total       |      | 31               | 70   | 121  | 27   | 9    | 258   |

- **Conclusions:** A cutpoint of “2” on the IRS and “1” on the CIS are the first cutpoints below the empirically-based percentile threshold of “below 82” for no impairment (Goldstein & Naglieri, 2016). These cutpoints are also theoretically consistent with scale interpretation as they correspond with the first item response below the midpoint of the IRS and CIS scales.
- **Limitations:** We elected to choose easy to use, item-based thresholds, to preserve clinical applicability and our desire to use an “or” rule to require lack of impairment in all domains (rather than mean score-based cutoffs that could allow high impairment in one domain as long as there was no impairment in others). One limitation of this approach is that, due to the categorical nature of our cutpoints, the adolescent criterion based on the CIS represents a moderately stricter threshold (i.e., approximately 71% percentile) compared to the adult cutpoint based on the IRS (i.e., approximately 82% percentile). The fewer number of response options on the CIS, compared to the IRS, created this asynchrony. This limitation will be considered when interpreting the findings of the study.
- **References for Impairment Analyses:**

Crawford, J. R., Garthwaite, P. H., & Slick, D. J. (2009). On percentile norms in neuropsychology: Proposed reporting standards and methods for quantifying the uncertainty over the percentile ranks of test scores. *The Clinical Neuropsychologist*, 23, 1173–1195. doi:10.1080/13854040902795018

Goldstein, S., & Naglieri, J. A. (2016). *Measuring Impairment with the Rating Scale of Impairment*. In *Assessing Impairment* (pp. 247-255). Springer, Boston, MA.

### **S3. Details of Full Remission Classification**

At step 1, symptom remission criteria from our ROC analyses were applied to ensure that cases no longer possessed clinically meaningful ADHD symptoms. At the second step, absence of impairment was evaluated to ensure that subthreshold residual symptoms were unassociated with impairment. At the third step, we required symptom remission to be independent of the therapeutic effects of current medication (i.e., medication use in the 30 days prior to the assessment), recent psychosocial therapy for ADHD (i.e., a full course of psychosocial treatment in the past year), or school-based ADHD intervention (i.e., current school services) by requiring that remitted cases were not being treated acutely.

### **S4. Classification of Persistent and Partially Remitted Cases**

We utilized the DSM-5 definition of persistence validated in Sibley et al., 2016 and Hechtman et 2017 that applied the DSM-5 symptom threshold using the CAARS (or SNAP) and impairment threshold of “3 or higher” based on the IRS (or CIS). Partially remitted cases were those who did not meet criteria for Persistence, but also did not meet criteria for Full Remission due to various rule outs.

### **S5. Consideration of Cases below the ADHD symptom remission threshold with continued impairment that may be better accounted for by a comorbidity.**

Because it is possible that impairment may be due to symptoms other than ADHD, we extracted, for a second round of consideration, cases that met the following criteria: (1) not currently treated for ADHD, (2) below the symptom remission threshold, (3) possessed clinically significant impairment, and (4) met criteria for a mental or substance use disorder (other than ADHD) on the DISC interview. The DISC interview assessed mood disorders (major depression, dysthymia, mania), anxiety disorders (agoraphobia, generalized anxiety disorder, obsessive compulsive disorder, panic disorder, separation anxiety disorder, social phobia, selective mutism, post-traumatic stress disorder), disruptive behavior disorders (oppositional defiant disorder, conduct disorder), substance use disorders (abuse and dependence), and eating disorders (anorexia nervosa, bulimia nervosa). Following extraction, a panel of clinical experts (three child and adolescent psychiatrists, four clinical psychologists) were provided with case information that included the domains of impairment experienced by each case along with DISC diagnoses, and the nature of residual ADHD symptoms (below remission threshold). If a majority of panel members voted that the case should be considered fully remitted from ADHD (i.e., the DISC diagnoses likely explained the reported impairments), the case was considered a tentative full remitter at that time point. In the table below we list the number of cases that were considered for secondary remission at each assessment point, along with the number of cases confirmed as secondary remission by the panel. We also display the details of these cases below.

| Assessment Point     | N Considered for ADHD Remission in presence of another disorder | Confirmed by Panel |
|----------------------|-----------------------------------------------------------------|--------------------|
| 2 year               | 5                                                               | 1                  |
| 3 year               | 7                                                               | 3                  |
| 6 year               | 5                                                               | 1                  |
| 8 year               | 17                                                              | 4                  |
| 10 year <sup>a</sup> | --                                                              | --                 |
| 12 year              | 22                                                              | 2                  |
| 14 year              | 27                                                              | 5                  |
| 16 year              | 11                                                              | 2                  |

<sup>a</sup>The DISC was not administered to a majority of participants at the 10 year assessment; as a result secondary remission could not be considered during this time point.

### Details of Fully Remitted Cases with Impairment Due to Another Disorder

| Age   | Impairment Domain                                               | DSM Dx                                                            | Endorsed ADHD Symptoms | Votes for ADHD Full Remission? |
|-------|-----------------------------------------------------------------|-------------------------------------------------------------------|------------------------|--------------------------------|
| 12.28 | feeling nervous behavior at school, getting along with          | Separation Anxiety                                                | Careless mistakes      | Yes-6, No-0                    |
| 11.1  | siblings getting along with father, feeling                     | Simple Phobia                                                     | none reported          | Yes-4, No-2                    |
| 11.13 | nervous getting along with mother, getting along with siblings, | Simple Phobia                                                     | none reported          | Yes-6, No-0                    |
| 11    | schoolwork                                                      | Simple Phobia, Separation Anxiety                                 | none reported          | Yes-5, No-1                    |
| 16.12 | schoolwork                                                      | Tic Disorder                                                      | none reported          | Yes-6, No-0                    |
| 17.99 | behavior at school, getting along with siblings                 | Alcohol Abuse, Marijuana Dependence, Nicotine Dependence, ODD, CD | none reported          | Yes-7, No-0                    |

|       |                                                                                                                                                                  |                                                                                                     |                                                                 |             |
|-------|------------------------------------------------------------------------------------------------------------------------------------------------------------------|-----------------------------------------------------------------------------------------------------|-----------------------------------------------------------------|-------------|
| 17.41 | feeling unhappy or sad behavior at school, involvement in activities,                                                                                            | Selective Mutism, Alcohol Abuse                                                                     | None reported                                                   | Yes-7, No-0 |
| 17.12 | schoolwork getting along with father, getting along with siblings,                                                                                               | Specific Phobia (miscellaneous) Separation Anxiety, selective                                       | none reported                                                   | Yes-6, No-1 |
| 15.72 | schoolwork academic impairment, overall impairment, impairment with parents, family impairment, impairment with teachers, romantic impairment, social impairment | Mutism                                                                                              | none reported                                                   | Yes-7, No-0 |
| 20.63 | impairment with parents                                                                                                                                          | Marijuana Abuse                                                                                     | none reported avoids tasks that require sustained mental effort | Yes-7, No-0 |
| 19.91 | impairment with parents                                                                                                                                          | Marijuana Abuse Alcohol Dependence; taking Abillify/Lithobid for "Bipolar disorder (self-reported)" | difficulty playing quietly, on the go/driven by a motor         | Yes-5, No-2 |
| 23.89 | sibling impairment, impairment in self-esteem                                                                                                                    |                                                                                                     |                                                                 | Yes-5 No-0  |
| 23.86 | impairment with parents impairment in self-esteem, family impairment, romantic impairment, overall impairment, family impairment,                                | CD                                                                                                  | talks excessively                                               | Yes-4 No-2  |
| 24.00 | academic impairment, overall impairment                                                                                                                          | Marijuana Dependence, Nicotine Dependence                                                           | on the go/driven by a motor                                     | Yes-5 No-1  |
| 21.49 | social impairment, impairment with                                                                                                                               | Alcohol Dependence                                                                                  | none reported                                                   | Yes-6, No-0 |

|       |                                                                                                                                                                         |                                                                     |                             |             |
|-------|-------------------------------------------------------------------------------------------------------------------------------------------------------------------------|---------------------------------------------------------------------|-----------------------------|-------------|
| 21.11 | parents, academic, impairment in self-esteem, family impairment, overall impairment academic impairment, sibling impairment, impairment with parents, social impairment | PTSD, Marijuana Dependence Specific Phobia of Thunder and Lightning | on the go/driven by a motor | Yes-6, No-0 |
| 26.57 | impairment with parents social impairment, impairment with parents, vocational impairment, impairment in self-esteem, family impairment, overall impairment             | Alcohol Abuse                                                       | none reported               | Yes-6, No-1 |
| 23.8  | impairment                                                                                                                                                              | Alcohol Abuse                                                       | none reported               | Yes-5, No-2 |

*Note.* Cases above possess ADHD symptoms that are below the empirically-validated threshold for full remission (i.e., three or fewer symptoms of Inattention and/of Hyperactivity/Impulsivity, but elevated impairment. The clinical panel elected to classify these cases and fully remitted because it appeared that impairments were most likely due to a disorder other than ADHD.

**Details of Cases with Comorbidities that the Panel Elected to Retain in the Partially Remitted Category**

| Age   | Impairment Domain                                                                                                          | DSM Dx                                   | Endorsed ADHD Symptoms                               | Votes for ADHD Remission? |
|-------|----------------------------------------------------------------------------------------------------------------------------|------------------------------------------|------------------------------------------------------|---------------------------|
| 12.15 | getting along with mother, getting along with father, behavior at school, schoolwork, behavior at home academic impairment | Simple Phobia                            | None Reported                                        | No-6                      |
| 9.85  | behavior at home, getting into trouble, getting along with father, feeling                                                 | Simple Phobia, Social Phobia, Separation | Doesn't seem to Listen, easily distracted, forgetful | No-6                      |



|       |                                                                                                                                                                                                  |                    |                                                                                                                                                                                                |             |
|-------|--------------------------------------------------------------------------------------------------------------------------------------------------------------------------------------------------|--------------------|------------------------------------------------------------------------------------------------------------------------------------------------------------------------------------------------|-------------|
|       | nervous, getting along with siblings, getting into trouble, getting along with father, behavior at school, feeling nervous, getting along with peers                                             | Anxiety Disorder   |                                                                                                                                                                                                |             |
| 9.5   | getting along with father, feeling unhappy or sad, involvement in activities, schoolwork                                                                                                         | Social Phobia      | careless mistakes, difficulty organizing tasks/activities                                                                                                                                      | No-6        |
| 9.26  | getting into trouble, getting along with father, feeling unhappy or sad, feeling nervous, getting along with siblings, behavior at home                                                          | Nocturnal Enuresis | None Reported                                                                                                                                                                                  | No-2, Yes-4 |
| 12.94 | social impairment getting into trouble, getting along with mother, feeling unhappy or sad, behavior at school, having fun, getting along with adults, getting along with peers, behavior at home | ODD                | careless mistakes, careless mistakes, does not follow through on instructions, difficulty organizing tasks/activities, Blurts out answers, Difficulty waiting in lines, interrupts or intrudes | Yes-2, No-4 |
| 11.06 | Behavior at School                                                                                                                                                                               | ODD                | careless mistakes, on the go/driven by a motor                                                                                                                                                 | No-6        |
| 10.91 | behavior at school, schoolwork                                                                                                                                                                   | Nocturnal Enuresis | difficulty organizing tasks/activities, easily distracted, talks excessively, interrupts or intrudes                                                                                           | No-6        |
| 11.03 | getting into trouble, getting along with mother                                                                                                                                                  | Simple Phobia      |                                                                                                                                                                                                | No-6        |

|       |                                                                                                                                        |                                                                                            |                                                                                                                  |             |
|-------|----------------------------------------------------------------------------------------------------------------------------------------|--------------------------------------------------------------------------------------------|------------------------------------------------------------------------------------------------------------------|-------------|
| 16.29 | getting along with peers                                                                                                               | Marijuana Abuse                                                                            | fidgets, on the go/driven by motor                                                                               | No-6        |
| 15.26 | feeling unhappy or sad                                                                                                                 | Alcohol Abuse                                                                              | talks excessively, blurts out                                                                                    | No-6, Yes-1 |
| 14.04 | relationship with mother, relationship with father, behavior at school, feeling nervous, peer impairment, schoolwork, behavior at home | Social Phobia                                                                              | doesn't seem to listen, difficulty organizing tasks/activities, forgetful                                        | No-7        |
| 14    | involvement in activities                                                                                                              | Tic Disorder                                                                               | difficulty organizing tasks/activities, Easily distracted, fidgets, leaves seat, on the go/driven by motor       | No-7        |
| 18    | getting in trouble, getting along with mother, behavior at home                                                                        | Marijuana Abuse, ODD                                                                       | talks excessively                                                                                                | No-7        |
| 17    | getting along with mother, feeling nervous, getting along with siblings, schoolwork                                                    | Specific Phobia of thunder and lightning, separation anxiety disorder, Marijuana Abuse, CD | does not follow through on instructions, avoids tasks that require sustained mental effort, easily distracted    | No-7        |
| 17.05 | getting along with father, getting along with siblings, schoolwork                                                                     | ODD                                                                                        | difficulty sustaining attention, does not follow through on instructions, difficulty organizing tasks/activities | No-7        |
| 17.96 | behavior at school, schoolwork                                                                                                         | Specific Phobia, Alcohol Dependence,                                                       | does not follow through on instructions                                                                          | No-7        |

|       |                                                                                                                                                                                                                                                                                                         |                                                                   |                                                                                                                                                                                                   |      |
|-------|---------------------------------------------------------------------------------------------------------------------------------------------------------------------------------------------------------------------------------------------------------------------------------------------------------|-------------------------------------------------------------------|---------------------------------------------------------------------------------------------------------------------------------------------------------------------------------------------------|------|
|       |                                                                                                                                                                                                                                                                                                         | Marijuana Abuse, Substance Dependence, Transient Tic Disorder, CD |                                                                                                                                                                                                   |      |
| 17.59 | getting in trouble, relationship with mother, feeling unhappy or sad, behavior at school, getting along with adults, feeling nervous, schoolwork, behavior at home relationship with mother, sad, having fun, getting along with adults, peer impairments, getting involved with activities, schoolwork | CD                                                                | does not follow through on instructions, easily distracted                                                                                                                                        | No-7 |
| 16.89 |                                                                                                                                                                                                                                                                                                         | Substance Abuse, Major Depressive Disorder                        | careless errors, does not seem to listen, fidgets does not seem to listen, on the go/driven by a motor                                                                                            | No-7 |
| 17.06 | getting along with father                                                                                                                                                                                                                                                                               | Nicotine Dependence                                               |                                                                                                                                                                                                   | No-7 |
| 17.44 | getting in trouble, getting along with father, getting along with siblings                                                                                                                                                                                                                              | Specific Phobia of Needles                                        | avoids tasks that require sustained mental effort, easily distracted difficulty sustaining attention, does not seem to listen, easily distracted, on the go/driven by a motor, talks excessively, | No-7 |
| 17.15 | getting along with father, getting along with siblings                                                                                                                                                                                                                                                  | ODD                                                               | Interrupts or Intrudes                                                                                                                                                                            | No-7 |
| 16.87 | feeling unhappy or sad, behavior at school, feeling                                                                                                                                                                                                                                                     | Specific Phobia of Needles, separation                            | difficulty sustaining attention, loses                                                                                                                                                            | No-7 |

|       |                                                                                                                                                                                                                                                                                                             |                                                                                     |                                                                                                                                                    |             |
|-------|-------------------------------------------------------------------------------------------------------------------------------------------------------------------------------------------------------------------------------------------------------------------------------------------------------------|-------------------------------------------------------------------------------------|----------------------------------------------------------------------------------------------------------------------------------------------------|-------------|
|       | nervous, getting along with siblings, getting along with peers, schoolwork, behavior at home getting in trouble, relationship with mother, relationship with father, sad, school behavior, having fun, getting along with adults, feeling nervous, peer impairment, trouble joining activities, schoolwork, | anxiety disorder                                                                    | things, fidgets, leaves seat, talks excessively                                                                                                    |             |
| 16.01 | behavior at home getting into trouble, behavior at school, schoolwork                                                                                                                                                                                                                                       | ODD, CD                                                                             | careless errors, difficulty sustaining attention, does not seem to listen, leaves seat, difficulty waiting for things                              | No-7        |
| 16.31 | schoolwork                                                                                                                                                                                                                                                                                                  | CD                                                                                  | leaves seat does not follow through on instructions, avoids tasks that require sustained mental effort, leaves seat, difficulty waiting for things | No-6, Yes-1 |
| 16.07 | getting in trouble, getting along with father, behavior at school, getting along with siblings, trouble joining activities, schoolwork, behavior at home                                                                                                                                                    | CD                                                                                  | difficulty organizing tasks/activities, easily distracted, fidgets, difficulty waiting ones turn, interrupts/intrudes                              | No-7        |
| 21.84 | social impairment, vocational impairment, family impairment, overall impairment                                                                                                                                                                                                                             | Alcohol Abuse                                                                       | difficulty organizing tasks/activities, easily distracted, runs about or climbs excessively, on the go/driven by a motor                           | No-7        |
| 22.55 | social impairment, impairment with parents, academic impairment, vocational impairment, impairment in self-esteem, family impairment, romantic                                                                                                                                                              | Major Depressive Disorder, Alcohol Dependence, Marijuana Abuse, Nicotine Dependence |                                                                                                                                                    | No-7        |

|       |                                                                                                                                                                                                                                                                              |                                               |                                                                                                                    |      |
|-------|------------------------------------------------------------------------------------------------------------------------------------------------------------------------------------------------------------------------------------------------------------------------------|-----------------------------------------------|--------------------------------------------------------------------------------------------------------------------|------|
|       | impairment, overall impairment, academic impairment, impairment with teachers, impairment in self-esteem, romantic impairment, overall impairment                                                                                                                            |                                               |                                                                                                                    |      |
| 21.96 | academic impairment, overall impairment                                                                                                                                                                                                                                      | Marijuana Abuse                               | fidgets, runs about or climbs excessively, on the go/driven by a motor                                             | NO-7 |
| 21.49 | social impairment, sibling impairment, impairment with parents, family impairment                                                                                                                                                                                            | Alcohol Dependence                            | does not seem to listen, difficulty waiting ones turn                                                              | No-7 |
| 21.35 | social impairment, sibling impairment, impairment with parents, vocational impairment, impairment in self-esteem, family impairment, overall impairment, soical, impairment wiht parents, family impairment, co-worker impairment, supervisor impairment, overall impairment | Marijuana Abuse, Nicotine Dependence, ODD, CD | does not follow through on instructions/fails to finish, avoids taks that require sustained mental effort, fidgets | NO-7 |
| 21.29 | academic impairment, impairment wiht parents, academic impairment, impairment in self-esteem, overall impairment                                                                                                                                                             | CD; missing YA DISC                           | forgetful in daily activities, fidgets, on the go/driven by a motor                                                | NO-7 |
| 21.6  | impairment with parents, vocational impairment                                                                                                                                                                                                                               | Alcohol Abuse, Marijuana Abuse                | makes careless errors, avoids taks that require                                                                    | No-7 |

|       |                                                                                                                                                         |                                                            |                                                                                                                                           |      |
|-------|---------------------------------------------------------------------------------------------------------------------------------------------------------|------------------------------------------------------------|-------------------------------------------------------------------------------------------------------------------------------------------|------|
|       |                                                                                                                                                         |                                                            | sustained mental effort, difficulty playing quietly, on the go/driven by a motor                                                          |      |
| 21.01 | social impairment, academic impairment, impairment in self-esteem, romantic impairment, overall impairment, impairment with parents, overall impairment | Alcohol Abuse                                              | avoids tasks that require sustained mental effort, leaves seat, runs about or climbs excessively, on the go/driven by a motor             | No-7 |
| 21.1  | social impairment, romantic impairment, vocational impairment                                                                                           | Marijuana Abuse; Received Therapy for OCD in this interval | difficulty sustaining attention, easily distracted, forgetful in daily activities, talks excessively                                      | NO-7 |
| 22.05 | social impairment, sibling impairment, impairment in self-esteem, family impairment, romantic impairment, overall impairment                            | Marijuana Abuse, Substance Abuse                           | does not seem to listen, avoids tasks that require sustained mental effort, on the go/driven by a motor, blurts out, interrupts/intrudes  | NO-7 |
| 20.87 | academic impairment, academic impairment                                                                                                                | Alcohol Dependence                                         | does not seem to listen, on the go/driven by a motor                                                                                      | No-7 |
| 20.3  | vocational impairment, family impairment                                                                                                                | OCD, Marijuana Dependence, Nicotine Dependence             | difficulty organizing tasks/activities, avoids tasks that require sustained mental effort, on the go/driven by a motor, talks excessively | No-7 |

|       |                                                                                                                                                                 |                                                               |                                                                                                                                                                                                                         |             |
|-------|-----------------------------------------------------------------------------------------------------------------------------------------------------------------|---------------------------------------------------------------|-------------------------------------------------------------------------------------------------------------------------------------------------------------------------------------------------------------------------|-------------|
| 20.31 | impairment with parents, impairment in self-esteem, family impairment, overall impairment impairment wiht parents, family impairment, impairment in self-esteem | Tic Disorder;<br>No parent Disc<br>Alcohol Abuse,<br>Alcohol  | loses things,<br>forgetful in daily activities                                                                                                                                                                          | No-7        |
| 20.57 | academic impairment, overall impairment, academic impairment                                                                                                    | Dependence,<br>Marijuana Abuse, Nicotine Dependence           | makes careless errors, fidgets, on the go/driven by a motor, blurts out does not follow through on instructions/fails to finish, avoids taks that require sustained mental effort, fidgets, on the go/driven by a motor | No-7        |
| 20.47 | sibling impairment, sibling impairment                                                                                                                          | Alcohol Abuse,<br>Marijuana Abuse, Nicotine Dependence;<br>CD | difficulty sustaining attention, does not seem to listen, easily distracted, on the go/driven by a motor                                                                                                                | No-6, Yes-1 |
| 19.41 | sibling impairment impairment in self-esteem, family impairment, romantic impairment, academic impairment, impairment with teachers, impairment in self-esteem  | Alcohol Abuse,<br>Alcohol Abuse                               | by a motor                                                                                                                                                                                                              | No-6, Yes-1 |
| 20.15 | impairment with parents, impairment in self-esteem, family impairment                                                                                           | Alcohol Abuse;<br>No parent DISC                              | SN, does not seem to listen, avoids taks that require sustained mental effort, fidgets, on the go/driven by a motor                                                                                                     | No-7        |
| 19.28 | impairment with parents, impairment in self-esteem, family impairment                                                                                           | CD                                                            | does not follow through on instructions/fails to finish, difficulty                                                                                                                                                     | No-7        |

|       |                                                                                                                                                          |                                                    |                                                                                                                                                                                                                                                            |             |
|-------|----------------------------------------------------------------------------------------------------------------------------------------------------------|----------------------------------------------------|------------------------------------------------------------------------------------------------------------------------------------------------------------------------------------------------------------------------------------------------------------|-------------|
|       |                                                                                                                                                          |                                                    | organizing tasks/activities, difficulty playing quietly, on the go/driven by a motor, talks excessively                                                                                                                                                    |             |
| 19.17 | sibling impairment, academic impairment, impairment in self-esteem, family impairment, overall impairment, sibling impairment, impairment in self-esteem | Selective Mutism                                   | does not follow through on instructions/fails to finish, avoids tasks that require sustained mental effort, blurts out does not follow through on instructions/fails to finish, difficulty playing quietly, on the go/driven by a motor, talks excessively | No-7        |
| 19.81 | academic impairment                                                                                                                                      | Tic Disorder                                       | excessively                                                                                                                                                                                                                                                | No-7        |
| 25.01 | impairment with parents, academic impairment, vocational impairment, impairment in self-esteem, family impairment, overall impairment                    | Selective Mutism, Alcohol Abuse                    | makes careless errors, difficulty sustaining attention, difficulty organizing tasks/activities, blurts out, difficulty waiting ones turn                                                                                                                   | No-5        |
| 24.14 | impairment with parents                                                                                                                                  | Alcohol Abuse, Alcohol Dependence, Marijuana Abuse | difficulty organizing tasks/activities, avoids tasks that require sustained mental effort, on the go/driven by a motor                                                                                                                                     | NO-4, Yes-1 |
| 24.28 | impairment with parents, academic                                                                                                                        | Alcohol Abuse, Nicotine                            | easily distracted, leaves seat                                                                                                                                                                                                                             | No-5        |



|       |                                                                                                                                                                                              |                                                                 |                                                                                                                                                       |      |
|-------|----------------------------------------------------------------------------------------------------------------------------------------------------------------------------------------------|-----------------------------------------------------------------|-------------------------------------------------------------------------------------------------------------------------------------------------------|------|
|       | impairment, impairment in self-esteem, family impairment, romantic impairment, overall impairment, impairment wiht parents, family impairment, impairment in self-esteem, overall impairment | Dependence; no parent disc                                      |                                                                                                                                                       |      |
| 23.93 | family impairment                                                                                                                                                                            | CD                                                              | difficulty sustaining attention, difficulty organizing tasks/activities, on the go/driven by a motor, difficulty waiting ones turn                    | No-5 |
| 23.9  | family impairment, family impairment                                                                                                                                                         | Alcohol Abuse                                                   | difficulty sustaining attention, difficulty organizing tasks/activities, easily distracted, difficulty playing quietly, talks excessively, blurts out | No-5 |
| 23.59 | vocational impairment, impairment in self-esteem, social impairment                                                                                                                          | Alcohol Abuse, Marijuana Abuse, Substance Abuse; no parent DISC | difficulty sustaining attention, difficulty organizing tasks/activities, forgetful in daily activities, on the go/driven by a motor, blurts out       | No-5 |
| 23.5  | sibling impairment                                                                                                                                                                           | Marijuana Abuse                                                 | avoids taks that require sustained mental effort, loses things, on                                                                                    | No-5 |

|       |                                                                                                                                                                                                                                       |                                                                                       |                                                                                                                                                                              |      |
|-------|---------------------------------------------------------------------------------------------------------------------------------------------------------------------------------------------------------------------------------------|---------------------------------------------------------------------------------------|------------------------------------------------------------------------------------------------------------------------------------------------------------------------------|------|
| 24.18 | impairment in self-esteem<br>social impairment,<br>sibling impairment,<br>impairment with<br>parents, vocational<br>impairment,<br>impairment in self-<br>esteem, family<br>impairment, romantic<br>impairment, overall<br>impairment | Generalized<br>Anxiety<br>Disorder,<br>Marijuana<br>Dependence,<br>Substance<br>Abuse | the go/driven by a<br>motor, blurts out<br>makes careless<br>errors, difficulty<br>organizing<br>tasks/activities,<br>avoids taks that<br>require sustained<br>mental effort | No-5 |
| 23.15 | social impairment,<br>sibling impairment,<br>impairment with<br>parents, academic<br>impairment, family<br>impairment                                                                                                                 | Alcohol Abuse                                                                         | difficulty<br>organizing<br>tasks/activities                                                                                                                                 | No-6 |
| 23    | impairment in self-<br>esteem, Social<br>impairment,<br>supervisor<br>impairment,<br>impairment in self-<br>esteem, Social<br>impairment,<br>supervisor<br>impairment,<br>impairment in self-<br>esteem                               | Alcohol<br>Dependence                                                                 | difficulty<br>organizing<br>tasks/activities,<br>avoids taks that<br>require sustained<br>mental effort                                                                      | No-6 |
| 22.81 | social impairment,<br>sibling impairment,<br>impairment with<br>parents, impairment<br>in self-esteem,<br>family impairment,<br>overall impairment,<br>social impairment,<br>vocational<br>impairment                                 | Alcohol Abuse;<br>no parent disc                                                      | forgetful in daily<br>activities, fidgets                                                                                                                                    | No-6 |
| 22.88 | social impairment,<br>impairment with<br>parents, vocational<br>impairment,                                                                                                                                                           | Selective<br>Mutism; no<br>parent DISC                                                | avoids taks that<br>require sustained<br>mental effort,<br>fidgets, runs about<br>or climbs<br>excessively                                                                   | No-6 |
| 22.68 | social impairment,<br>impairment with<br>parents, vocational<br>impairment,                                                                                                                                                           | Alcohol<br>Dependence,<br>Marijuana                                                   | does not seem to<br>listen, difficulty<br>organizing                                                                                                                         | No-6 |

|       |                                                                                                                                                                  |                                                      |                                                                                                                                                                                                                                                                              |      |
|-------|------------------------------------------------------------------------------------------------------------------------------------------------------------------|------------------------------------------------------|------------------------------------------------------------------------------------------------------------------------------------------------------------------------------------------------------------------------------------------------------------------------------|------|
|       | impairment in self-esteem, family impairment, overall impairment                                                                                                 | Dependence, Nicotine Dependence, Substance Abuse; CD | tasks/activities, avoids tasks that require sustained mental effort, on the go/driven by a motor difficulty organizing tasks/activities, avoids tasks that require sustained mental effort, runs about or climbs excessively, on the go/driven by a motor, talks excessively |      |
| 22.99 | social impairment, romantic impairment, social impairment, sibling impairment, academic impairment, vocational impairment, family impairment, overall impairment | CD                                                   |                                                                                                                                                                                                                                                                              | No-6 |
| 23.99 | sibling impairment, impairment with parents, family impairment, romantic impairment, overall impairment                                                          | Substance Dependence                                 | makes careless errors, loses things, easily distracted, interrupts/intrudes                                                                                                                                                                                                  | No-6 |
| 22.99 | sibling impairment, impairment with parents, family impairment, romantic impairment, overall impairment                                                          | Alcohol Dependence                                   | easily distracted, on the go/driven by a motor                                                                                                                                                                                                                               | No-6 |
| 21.72 | social impairment, sibling impairment, impairment with parents, family impairment, romantic impairment, overall impairment                                       | Marijuana Abuse; no parent DISC                      | makes careless errors, does not seem to listen, easily distracted, talks excessively, blurts out, interrupts/intrudes                                                                                                                                                        | No-6 |
| 22.72 | academic impairment, co-worker impairment, supervisor impairment                                                                                                 | OCD                                                  | loses things, fidgets, runs about or climbs excessively, on the go/driven by a motor                                                                                                                                                                                         | No-6 |

|       |                                                                                                                                                                                                                           |                                    |                                                                                                                                                                    |      |
|-------|---------------------------------------------------------------------------------------------------------------------------------------------------------------------------------------------------------------------------|------------------------------------|--------------------------------------------------------------------------------------------------------------------------------------------------------------------|------|
| 22.21 | social impairment, sibling impairment, impairment with parents , impairment in self-esteem,family impairment, romantic impairment, overall impairment, social, family impairment, romantic impairment, overall impairment | ODD                                | does not follow through on instructions/fails to finish, avoids taks that require sustained mental effort, fidgets, on the go/driven by a motor, talks excessively | No-6 |
| 22.26 | social impairment, overall impairment                                                                                                                                                                                     | Alcohol Abuse; ODD                 | does not seem to listen, avoids taks that require sustained mental effort, loses things, fidgets, leaves seat , difficulty waiting ones turn                       | No-6 |
| 21.35 | social impairment, sibling impairment, impairment with parents, vocational impairment, impairment in self-esteem, family impairment, overall impairment, sibling impairment, impairment in self-esteem                    | Social Phobia                      | avoids tasks that require sustained mental effort, talks excessively                                                                                               | No-6 |
| 21.61 | impairment with parents, impairment in self-esteem                                                                                                                                                                        | Marijuana Abuse                    | loses things, on the go/driven by a motor                                                                                                                          | No-6 |
| 26.16 | impairment with parents, academic impairment, impairment in self-esteem                                                                                                                                                   | Alcohol Abuse, Nicotine Dependence | does not seem to listen, avoids taks that require sustained mental effort, easily distracted                                                                       | No-6 |

|       |                                                                                                                                                                                                                          |                                                                               |                                                                                                                                                    |             |
|-------|--------------------------------------------------------------------------------------------------------------------------------------------------------------------------------------------------------------------------|-------------------------------------------------------------------------------|----------------------------------------------------------------------------------------------------------------------------------------------------|-------------|
| 26    | academic impairment, sibling impairment, impairment with parents, family impairment, vocational impairment                                                                                                               | Alcohol Abuse                                                                 | difficulty organizing tasks/activities, avoids tasks that require sustained mental effort, fidgets                                                 | No-6        |
| 25.23 | social impairment, sibling impairment, impairment with parents, impairment in self-esteem, family impairment, romantic impairment, overall impairment, romantic impairment                                               | Alcohol Abuse, Marijuana Dependence; ODD                                      | does not follow through on instructions/fails to finish, difficulty organizing tasks/activities, avoids tasks that require sustained mental effort | No-6        |
| 24.91 | impairment with parents, social impairment, sibling impairment, impairment with parents, academic impairment, vocational impairment, impairment in self-esteem, family impairment, overall impairment, family impairment | Alcohol Dependence, Marijuana Dependence, Substance Dependence, Alcohol Abuse | loses things, fidgets, runs about or climbs excessively                                                                                            | No-6, Yes-1 |
| 24.6  | impairment with parents, overall impairment, family impairment                                                                                                                                                           | Nicotine Dependence, Alcohol Abuse                                            | difficulty organizing tasks/activities, easily distracted, forgetful in daily activities                                                           | No-7        |
| 24.41 | romantic impairment, sibling impairment, impairment with parents, overall impairment, family impairment                                                                                                                  | Nicotine Dependence                                                           | avoids tasks that require sustained mental effort                                                                                                  | No-5, Yes-2 |
| 24.42 | impairment with parents, overall impairment, impairment with parents, overall impairment, impairment with                                                                                                                | Substance Abuse, Alcohol Abuse                                                | on the go/driven by a motor, talks excessively                                                                                                     | No-5, Yes-2 |

|       |                                                                                                                                                                                                                                                                                               |                                           |                                                                                   |      |
|-------|-----------------------------------------------------------------------------------------------------------------------------------------------------------------------------------------------------------------------------------------------------------------------------------------------|-------------------------------------------|-----------------------------------------------------------------------------------|------|
|       | parents, family impairment                                                                                                                                                                                                                                                                    |                                           | difficulty organizing tasks/activities, loses things, on the go/driven by a motor | No-7 |
| 23.72 | impairment with parents, impairment in self-esteem, family impairment, overall impairment, social impairment, sibling impairment, impairment with parents, impairment in self-esteem, family impairment, romantic impairment, overall impairment, sibling impairment, impairment with parents | Alcohol Dependence, Substance Dependence  |                                                                                   |      |
| 23.81 | parents                                                                                                                                                                                                                                                                                       | Marijuana Dependence, Nicotine Dependence | avoids tasks that require sustained mental effort, on the go/driven by a motor    | No-7 |

## S6. Rationale for Methodological Choices when Defining Cross-sectional and Longitudinal Categories

Our definition building process emphasized avoidance of known diagnostic pitfalls in the ADHD literature. Specifically we focused on: (1) eliminating recovery and remission definitions that would likely produce known methodological artefacts and (2) making choices that are sensible within the context of the MTA’s existing design. Through this process, we arrived at definitions that we believe are optimal.

With respect to the lower bound on duration of recovery, it was imperative to avoid the “snapshot” pitfall that besieges much of the extant research on ADHD persistence and remission—that is, if we allow an individual to be classified as recovered based on just a single time point of data, we cannot be sure that the duration of this remission is any longer than a month (i.e., the observational period elicited on the symptom rating scales). At the very least, we feel obligated to honor the DSM-5’s only guidance on defining remission (APA, 2013), which requires six months of symptom absence for partial remission—thus, we decided that six months should be considered the lower bound for duration of recovery—which rules out the one time point + no evidence of recurrence option for defining recovery.

With respect to the upper bound on duration of recovery, another alternative to our two time point + no recurrence definition could be requiring three or more time points + no recurrence. This would be a stricter definition that would impose a criterion of at least four years of full remission from ADHD + no recurrence to be classified as recovered. The disadvantage of this definition is related to the MTA’s design—participants were only followed until approximately age 25—therefore, most recovery that began after age 21 would be disqualified. As a group, we

decided that (a) because there is no real gold standard for determining the expected duration of recovery for ADHD (the current study is the first to estimate this statistic) and (b) because we wanted to take a moderate approach to defining recovery that balanced risk of false positive and false negative classifications—the two time point + no recurrence definition seemed like a pragmatic choice.

Similar issues were addressed when deciding how to define “stable partial remission.” This category was actually created by process of elimination. After sorting participants into the clinically meaningful “stable persistence,” “recovered,” and “fluctuating status” longitudinal classifications, there was one subgroup of participants who remained unclassified—these individuals had in common that they displayed “one classification change from persistent ADHD to partial remission that maintained until study endpoint.” Though one could argue that this category has low clinical utility, for completeness we created this category, which allowed us to sort all of the ADHD participants in the MTA study (except for a handful of outliers who had higher levels of missing data; see Figure 1) into one of four orthogonal longitudinal categories.

**S7. Final Definitions for Cross-Sectional and Longitudinal Classifications**

| <b>Classification</b>                  | <b>Definition</b>                                                                                                                                                                                                                                          |
|----------------------------------------|------------------------------------------------------------------------------------------------------------------------------------------------------------------------------------------------------------------------------------------------------------|
| <b>Cross-sectional Classifications</b> |                                                                                                                                                                                                                                                            |
| Persistent                             | DSM-5 symptom criteria (5 or 6 symptoms of either Inattention or Hyperactivity/Impulsivity, depending on age) plus clinically significant impairment (3 or higher on IRS or CIS)                                                                           |
| Full Remission                         | Fewer than three symptoms of both Inattention and Hyperactivity/Impulsivity according to all informants, plus the absence of clinically significant impairment, and discontinuation of all ADHD intervention for at least a month prior to the assessment. |
| Partial Remission                      | Those who neither met criteria for persistence, nor full remission                                                                                                                                                                                         |
| <b>Longitudinal Classifications</b>    |                                                                                                                                                                                                                                                            |
| Stable Persistence                     | Persistent ADHD for the entire follow-up period                                                                                                                                                                                                            |
| Recovered                              | Full remission of ADHD that persisted for at least two consecutive assessments without a subsequent period of recurrence (i.e., full remission until study endpoint)                                                                                       |
| Fluctuating                            | At least two changes to classification since baseline diagnosis of ADHD, in the absence of the recovery pattern                                                                                                                                            |
| Stable Partial Remission               | Displaying one classification change from persistent ADHD to partial remission that maintained until study endpoint.                                                                                                                                       |

## **S8. Additional discussion of limitations and considerations regarding the influence of medication on persistence.**

The analyses presented herein have some additional limitations that should be considered. For example, when using a broad diagnostic approach that includes partial remission as a negative outcome (i.e., a milder, but clinically significant, manifestation of ADHD), the results suggest that most childhood-onset cases (~90%) will continue to experience impairment and/or elevated symptoms during the follow-up period. An alternative interpretation could be offered if one applied a narrow diagnostic approach that considers partial remission to be a non-clinical outcome based on its subthreshold nature.

Following this logic, an alternative interpretation of our findings might be that only those with a chronic, persistent longitudinal pattern (10.8% of the sample) continue to demonstrate ADHD by young adulthood. Under this interpretation, sporadic symptom severity might be considered a positive outcome (i.e., relief from ADHD) versus a negative outcome (i.e., residual ADHD symptoms throughout the follow-up period).

Some of the methodological choices we made in this study were empirically selected because we could find no prevailing precedent in the research literature (i.e., CIS and IRS definitions for “lack of impairment,” statistically-derived threshold for “full remission” of ADHD). We also made several methodological choices in this study based on best diagnostic practices and previously validated methodologies found in past research conducted by our colleagues’ or our own team. For example, our methodology relied on multiple rather than single source verification (i.e., relying on self-report alone) based on past research validating combined reports as delivering incremental diagnostic information in the adolescent and young adult developmental periods (i.e., Barkley et al., 2008; Sibley et al., 2012a/b, 2016, 2017). Though we



present varying exclusion criteria for full remission in a stepwise manner (see Table 1), we opted for a restrictive, multi-phase exclusion criteria for full remission (symptom cutoff and impairment rather than impairment alone, requiring ADHD to be untreated). If we had applied a less restrictive definition of “full remission” (i.e., only relying on symptom desistence), our results might suggest higher rates of recovery and lower rates of partial remission. We hope that Table 1 presents sufficient information to allow readers to consider alternative definitions of full and partial remission, as well as aggregate partial and fully remitting cases at each time point, to envision the range of persistence and remission estimates that may be possible when using alternative definitions. Ultimately, we stand by our choices as representing best practices in the measurement of ADHD symptoms and impairment, as well as empirically-validated criteria.

There were also several possible formulas for calculating normative percentiles in the LNCG. These formulas are either theoretical or empirical. We considered multiple options and selected an empirically derived formula based on appropriateness for the distribution of LNCG symptom data. The use of a percentile cutoff (84%) based on positively skewed ratings of symptom severity in the LNCG has some complications that have been discussed elsewhere but have not been fully addressed here.

In the LNCG, the waxing and waning of symptom ratings also occurs (Sibley et al., 2018, *American Journal of Psychiatry*), but to a lesser extent than in the ADHD groups. When validating the full remission threshold against LNCG normative data, we did not directly adjust for this temporal variation in the ADHD group.

The additional remission exclusion criterion that was applied with respect to current treatment suggests that active treatment with medication confers a benefit to symptoms. This assumption may not be true. There were dramatic decreases in medication use over time in the

longitudinal follow-up and some preliminary data from the MTA suggest that dissipation of relative benefit of medication use over time. This trend is partially substantiated by a lack of symptom deterioration when MTA participants discontinue long-term stimulant medications. Therefore, our decision to be conservative, and require remission independent of medication, could be viewed as a mismatch with signals from the MTA data suggesting that medication use that has been sustained for many years likely has a minimal impact on symptoms in those with desistent profiles. Ongoing work in the MTA study will further clarify the relationship between medication and symptom persistence/remission during the long-term follow-up period.

**S9. Sensitivity Analyses**

*Analysis 1: Sensitivity analyses for Recovery Definition based on conservative vs. moderate vs. liberal thresholds for duration requirements*

Based on primary analysis methodology, 50 cases were classified as recovered (9.0%) based on the requirement that recovery sustain for two time points with no evidence of recurrence. If we were to apply the more liberal “one time point + no evidence of recurrence” criterion, we would classify 29 new cases as recovered (total recovery n=79), raising the recovery rate from 9.0% to 14.2%. Each of these 29 new cases experienced their episode of full remission at their final MTA assessment. Therefore, there is no evidence of either continued remission or recurrence because the study ended. Alternatively, if we were to utilize the more conservative “three or more time points + no evidence of recurrence” criterion, only 33 cases would be classified as recovered, lowering the recovery rate from 9.0% to 5.9%. Thus the lower and upper bound for recovery estimates might be 5.9% and 14.2%, respectively.

*Analysis 2: Sensitivity analyses for Longitudinal Classifications based on Varying Missing Data Approaches*

|                              | Primary Analyses (N=558) | Removal of Cases with <3 data points (N=536) | Removal of Cases with any missing data (N=249) |
|------------------------------|--------------------------|----------------------------------------------|------------------------------------------------|
| Stable Persistence (%)       | 10.8                     | 9.3                                          | 6.8                                            |
| Stable Partial Remission (%) | 15.6                     | 14.0                                         | 4.4                                            |
| Fluctuating Status (%)       | 64.0                     | 66.6                                         | 75.9                                           |
| Recovered (%)                | 9.0                      | 9.3                                          | 12.9                                           |

*Note.* Sensitivity analyses indicate that the fluctuating pattern may be underestimated based on missing data while the stable partial remission and stable persistence categories may be over-estimated.

*Analysis 3: Sensitivity analyses examining the impact of source of information-switching on categorical fluctuations over time.*

To investigate the impact of source of information switching (hereon referred to as “source switching” on categorical fluctuations over time, we first composed variables that represent the direction and magnitude of status changes from each assessment to the following assessment. A score of -2 indicated a two category reduction in status (i.e., from persistent to full remission), -1 a one category reduction in status (i.e., from persistent to partial remission or partial remission to full remission), 0=no change in status, 1 = a one category increase in status (i.e., from full remission to partial remission or partial remission to persistence), 2=a two category increase in status (i.e., from full remission to persistence). Histograms for each of these variables are shown below.

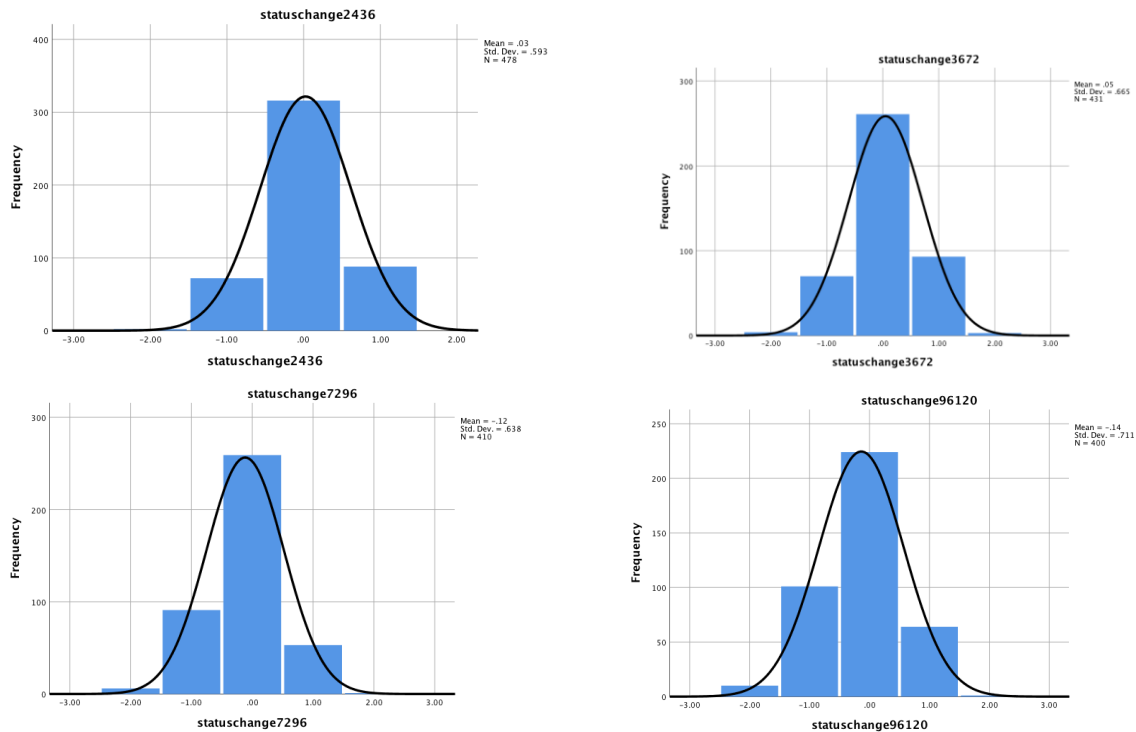

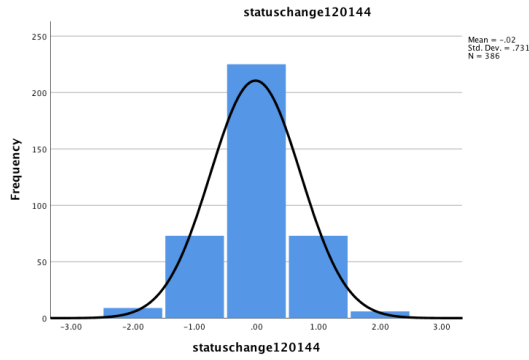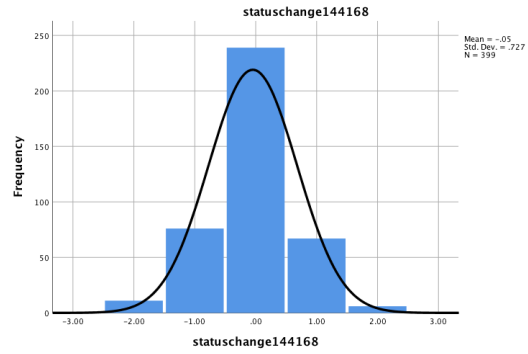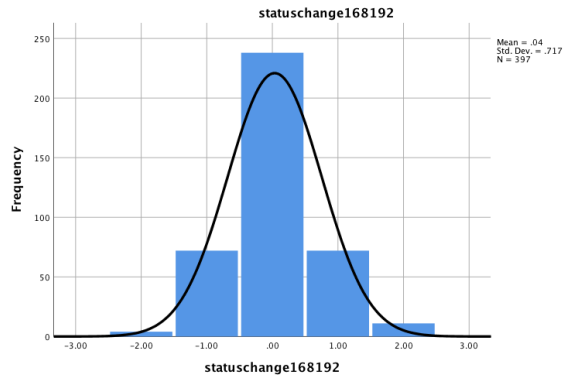

To understand the amount of variance in category changes that may be due to source switching, we created dummy coded variables that represented loss of a rater or gain of a rater between each time point. For assessments with three raters, we created four total dummy codes (loss of two raters, loss of one rater, gain of one rater, gain of two raters). The fluctuation (or status change) variable presented above was regressed upon these dummy codes for each time point. The table below presents the results of these multiple regression models for each time point. Results indicate that as a set of variables, the source-switch predictors accounted for between .07% and 5.1% of the variance in category fluctuations between two time points. While source switching had a significant impact on 5 out of 7 between-timepoint fluctuations, the size of this effect was generally quite modest. Over 95% of the variance in fluctuations was due to a source other than source-switching.

|                         | $R^2$ | $F$  | $p$   | $b$   | $SE$ | $p$  |
|-------------------------|-------|------|-------|-------|------|------|
| <u>2 year to 3 year</u> | .013  | 3.14 | .044* |       |      |      |
| Loss of rater           |       |      |       | -.149 | .081 | .064 |
| Gain of rater           |       |      |       | .136  | .088 | .123 |
| <u>3 year to 6 year</u> | .016  | 2.34 | .073  |       |      |      |
| Loss of rater           |       |      |       | -.155 | .089 | .081 |
| Gain of 1 rater         |       |      |       | .372  | .300 | .216 |
| Gain of 2 raters        |       |      |       | .484  | .315 | .126 |

|                    |      |      |        |       |      |        |
|--------------------|------|------|--------|-------|------|--------|
| 6 year to 8 year   | .042 | 4.44 | .002*  |       |      |        |
| Loss of 1 rater    |      |      |        | -.170 | .074 | .022*  |
| Loss of 2 raters   |      |      |        | -.548 | .178 | .002*  |
| Gain of 1 rater    |      |      |        | .073  | .117 | .532   |
| Gain of 2 raters   |      |      |        | 1.07  | .628 | .090   |
| 8 year to 10 year  | .041 | 4.27 | .002*  |       |      |        |
| Loss of 1 rater    |      |      |        | -.171 | .072 | .017*  |
| Loss of 2 raters   |      |      |        | -.959 | .270 | <.001* |
| Gain of 1 rater    |      |      |        | .033  | .118 | .777   |
| Gain of 2 raters   |      |      |        | .212  | .701 | .763   |
| 10 year to 12 year | .051 | 6.78 | <.001* |       |      |        |
| Loss of 1 rater    |      |      |        | -.186 | .083 | .026*  |
| Loss of 2 raters   |      |      |        | -.621 | .323 | .055   |
| Gain of 1 rater    |      |      |        | .724  | .219 | .001*  |
| 12 year to 14 year | .019 | 3.85 | .022*  |       |      |        |
| Loss of rater      |      |      |        | -.229 | .128 | .073   |
| Gain of rater      |      |      |        | .327  | .155 | .035*  |
| 14 year to 16 year | .007 | 1.36 | .259   |       |      |        |
| Loss of rater      |      |      |        | -.101 | .111 | .362   |
| Gain of rater      |      |      |        | .183  | .141 | .193   |

*Note.* \* $p < .05$ ,  $b$ =unstandardized beta,  $SE$ =standard error.

## S10. Longitudinal Patterns of Binary Persistence/Desistence

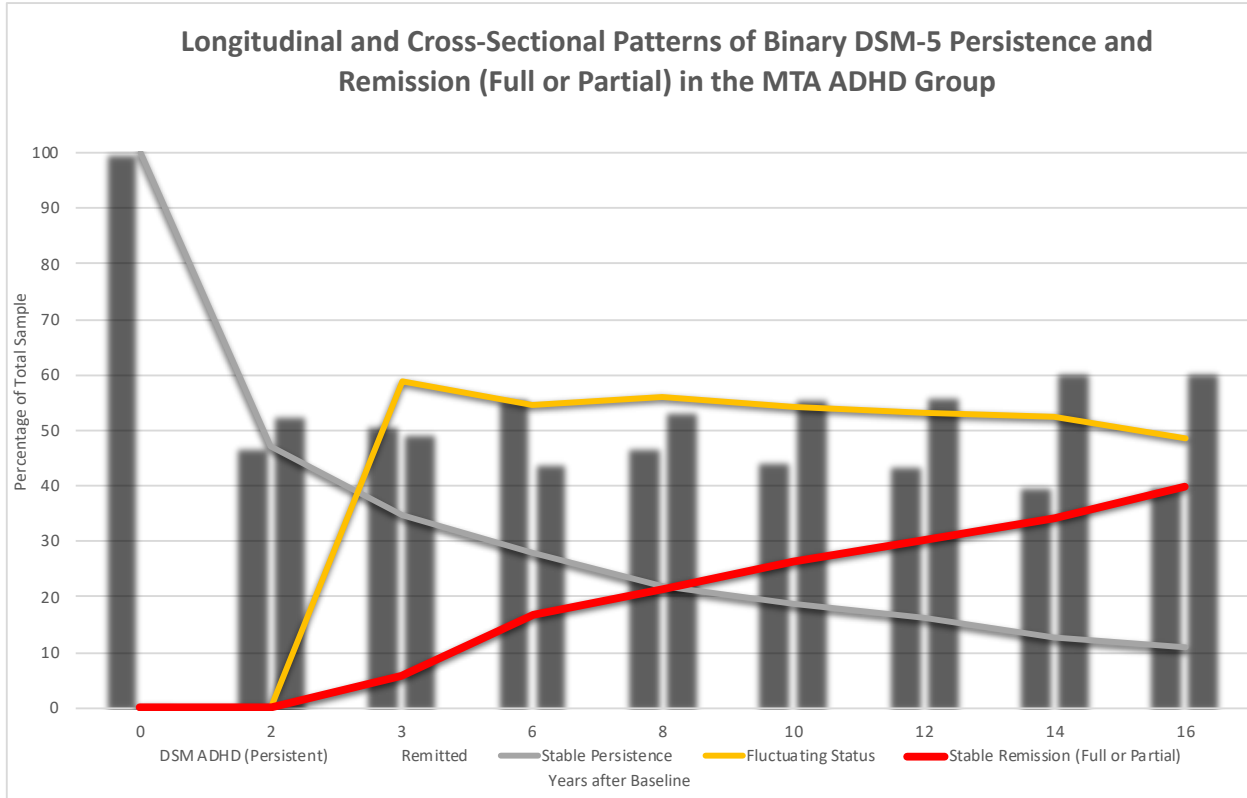

*Note.* Bar graphs indicate cross-sectional estimates for persistence and remission; line graphs display longitudinal patterns by time point. Individuals were classified as displaying stable persistence if they demonstrated persistent ADHD for all assessments to date in the follow-up period. Therefore, the gray line represents the percentage of participants who continued to demonstrate stable persistence at a given timepoint. Stable remission was defined as displaying one classification change from persistent ADHD to remission (full or partial) that maintained until study endpoint. Therefore, the red line represents the percentage of participants who had experienced onset of stable remission by the corresponding time point. A fluctuating pattern indicated at least two changes to cross-sectional classification since baseline diagnosis of ADHD in the absence of the stable remission pattern. Therefore, the yellow line represents the percentage of participants who meet criteria for fluctuating status at a given time point (which precludes also meeting criteria for stable remission at any future time point).
